# Supplementary material
Source: PubMed Central journal article supplement (PMC6112685)
Supplement: pnas.1802903115.sapp.pdf [file pnas.1802903115.sapp.pdf]

# Stabilized Photoanodes for Water Oxidation by Integrating Organic Dyes, Water Oxidation Catalysts, and Electron Transfer Mediators

Degao Wang,<sup>1¶</sup> Michael S. Eberhart,<sup>1¶</sup> Matthew V. Sheridan,<sup>1</sup> Ke Hu,<sup>2</sup> Benjamin D. Sherman,<sup>1#</sup> Animesh Nayak,<sup>1</sup> Ying Wang,<sup>1</sup> Seth L. Marquard,<sup>1</sup> Christopher J. Dares,<sup>3</sup> Thomas J. Meyer<sup>1\*</sup>

1. Department of Chemistry, University of North Carolina Chapel Hill, Chapel Hill, North Carolina 27599, United States
2. Department of Chemistry, Fudan University, Shanghai 200433, P. R. China
3. Department of Chemistry and Biochemistry, Florida International University, 11200 SW Eighth Street, Miami, Florida 33199, United States

¶: Degao Wang and Michael S. Eberhart contributed equally to this work.

#: Current address, Department Chemistry and Biochemistry, Texas Christian University, Fort Worth, TX 76129, USA

Corresponding author Email: [tjmeyer@unc.edu](mailto:tjmeyer@unc.edu)

## This PDF file includes:

Supplementary text  
Figs. S1 to S31  
Schemes S1 to S2

## **Supplementary Information**

### **Experimental section:**

#### **Uv-Vis spectroscopy**

Samples for optical measurements were fabricated in the same way as the devices described as above.

#### **Incident photon to current efficiency (IPCE) measurements**

IPCE measurements were performed with a 75 W xenon lamp (Oriel) and Oriel

Cornerstone 260

monochromator. Photocurrent data was taken at 10 nm increments and the light intensity at each wavelength was recorded using a UDT S370 optometer coupled to a UDT 260 detector. A CH Instruments 660D potentiostat was used to record the photocurrent transients and a bias of 0.4V vs. Ag/AgCl was used to collect the IPCE data.

#### **Generator/collector O<sub>2</sub> detection**

The generator/collector experiments for O<sub>2</sub> detection used a four electrode setup along with a bipotentiostat. Two FTO working electrodes in conjunction with a Pt counter and Ag/AgCl reference electrode were used. One FTO (generator) electrode was prepared as described for the core/shell photoanodes used in this study; the other FTO (collector) electrode was unmodified. Assembly of the generator/collector setup involved placing the two FTO electrodes with the conductive sides facing with narrow 1 mm thick glass spacers between the lateral edges and sealing the sides with epoxy (Hysol).

To measure the faradaic efficiency for O<sub>2</sub> production, the charge passed at the generator electrode during the illumination phase of the experiment was compared to the total charge passed at the collector electrode (poised at -0.85 V vs. Ag/AgCl) during the entire experiment. The faradaic efficiency was corrected for the collection efficiency of the generator/collector setup (70%) that was determined experimentally.

### **Transient Absorption.**

When TA was carried out, the slides were inserted at a 45° angle into a standard 1 cm<sup>2</sup> Pyrex cuvette. The top of the cuvette was fit with an O-ring seal with a Kontes valve inlet to allow the contents to be purged with Argon (Airgas, UHP). Measurements were performed by using 425nm nanosecond laser pulses produced by a Nd:YAG laser combined with a VersaScan OPO (5–7 ns, operated at 1 Hz, beam diameter 0.5 cm) integrated into a commercially available Edinburgh LP920 laser flash photolysis spectrometer system. A white light probe pulse was generated by a pulsed 450 W Xe lamp. The probe light was passed through a 400 nm long pass filter before reaching the sample to avoid direct band gap excitation of TiO<sub>2</sub>, then detected by a photomultiplier tube (Hamamatsu R928).

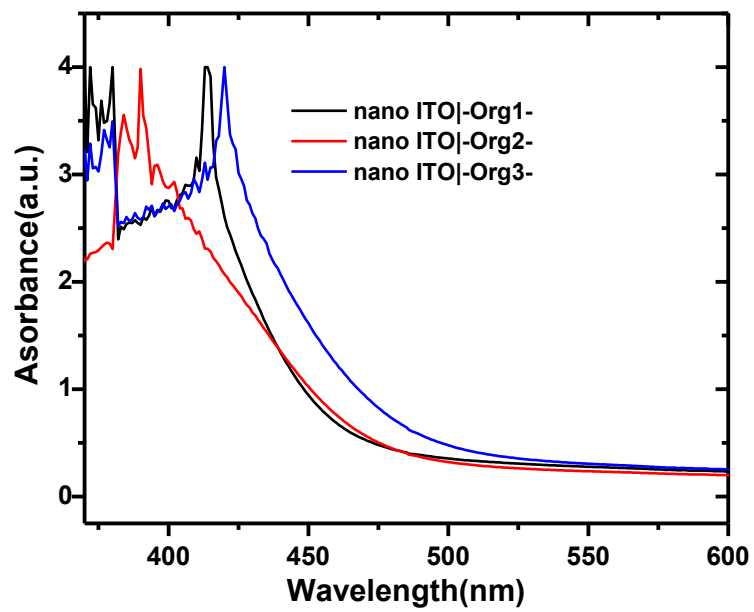

**Fig. S1.** The UV-Visible spectroscopy of the Organic dye on *nano* ITO.

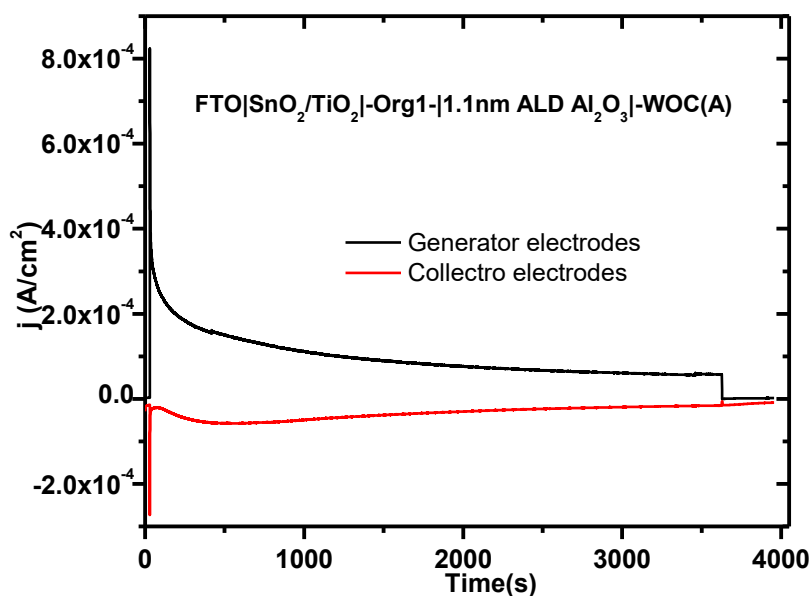

**Fig. S2.** O<sub>2</sub> measurements for water oxidation from (black), **FTO|SnO<sub>2</sub>/TiO<sub>2</sub>|-Org1-|1.1nm Al<sub>2</sub>O<sub>3</sub>|-RuP<sup>2+</sup>-WOC**, on 1 cm<sup>2</sup> slides illuminated with 100 mW cm<sup>-2</sup> white light with a 400 nm cutoff filter from 30 to 3630 s at a bias of 0.4V versus Ag/AgCl. The current-time response in red is for an O<sub>2</sub> sensing electrode, 1 mm from the photoanode biased at -0.85 V versus Ag/AgCl; in 0.1 M acetic acid/acetate buffer at pH 4.65 in 0.4 M NaClO<sub>4</sub>. FE of O<sub>2</sub> production is around 49%.

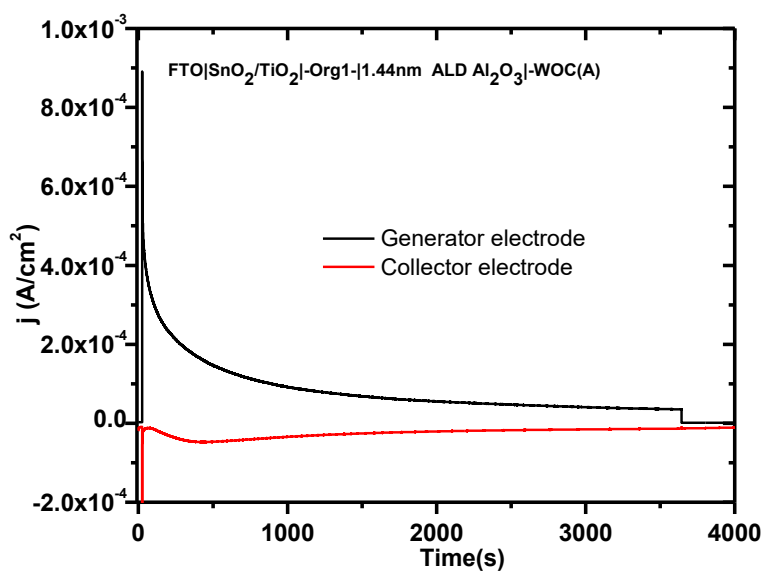

**Fig. S3.** O<sub>2</sub> measurements for water oxidation from (black), FTO|SnO<sub>2</sub>/TiO<sub>2</sub>|-Org1-|1.44nm Al<sub>2</sub>O<sub>3</sub>|- WOC, on 1 cm<sup>2</sup> slides illuminated with 100 mW cm<sup>-2</sup> white light with a 400 nm cutoff filter from 30 to 3630 s at a bias of 0.4V versus Ag/AgCl. The current-time response in red is for an O<sub>2</sub> sensing electrode, 1 mm from the photoanode biased at -0.85 V versus Ag/AgCl; in 0.1 M acetic acid/acetate buffer at pH 4.65 in 0.4 M NaClO<sub>4</sub>. FE of O<sub>2</sub> production is around 43%.

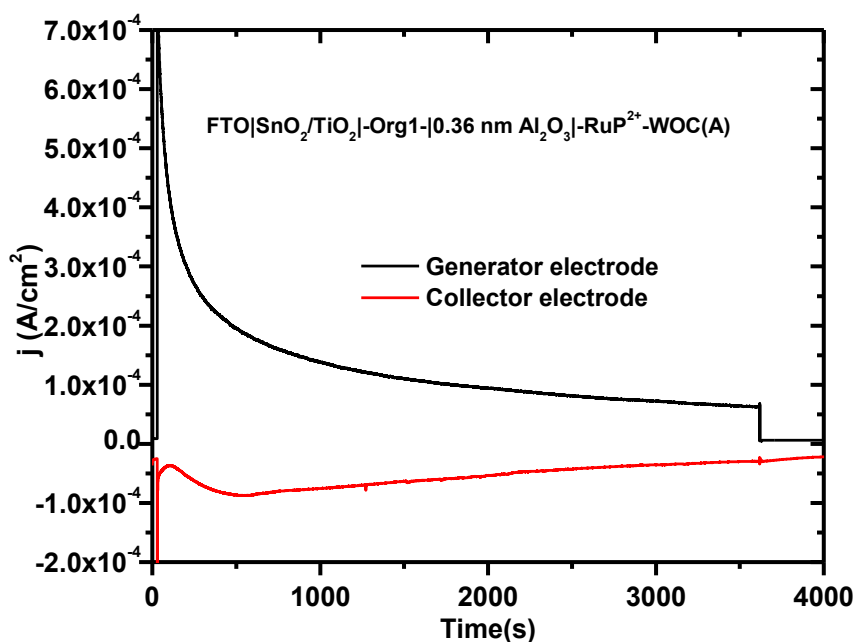

**Fig. S4.** O<sub>2</sub> measurements for water oxidation from (black), **FTO|SnO<sub>2</sub>/TiO<sub>2</sub>|-Org1-[0.36nm Al<sub>2</sub>O<sub>3</sub>]-RuP<sup>2+</sup>-WOC**, on 1 cm<sup>2</sup> slides illuminated with 100 mW cm<sup>-2</sup> white light with a 400 nm cutoff filter from 30 to 3630 s at a bias of 0.2 V versus Ag/AgCl. The current-time response in red is for an O<sub>2</sub> sensing electrode, 1 mm from the photoanode biased at -0.85 V versus Ag/AgCl; in 0.1 M acetic acid/acetate buffer at pH 4.65 in 0.4 M NaClO<sub>4</sub>. FE of O<sub>2</sub> production is around 55%.

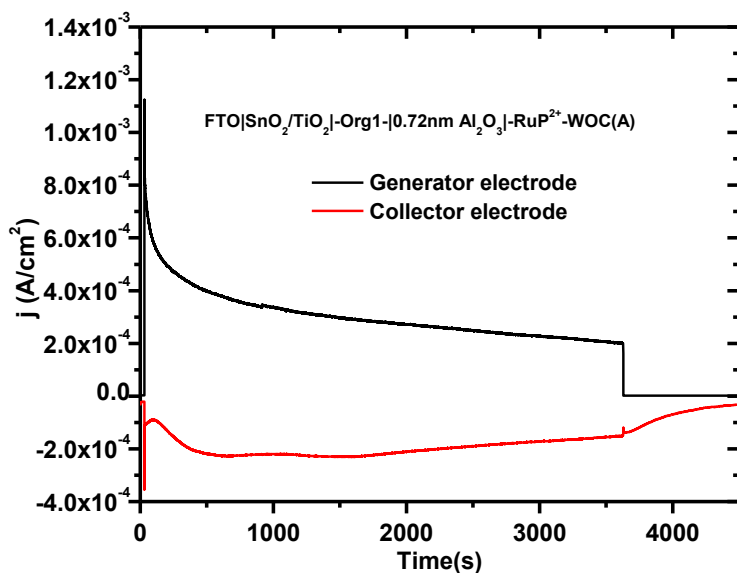

**Fig. S5.** O<sub>2</sub> measurements for water oxidation from (black), **FTO|SnO<sub>2</sub>/TiO<sub>2</sub>|-Org1-|0.72nm ALD Al<sub>2</sub>O<sub>3</sub>|-RuP<sup>2+</sup>-WOC(A)**, on 1 cm<sup>2</sup> slides illuminated with 100 mW cm<sup>-2</sup> white light with a 400 nm cutoff filter from 30 to 3630 s at a bias of 0.4 V versus Ag/AgCl. The current-time response in red is for an O<sub>2</sub> sensing electrode, 1 mm from the photoanode biased at -0.85 V versus Ag/AgCl; in 0.1 M acetic acid/acetate buffer at pH 4.65 in 0.4 M NaClO<sub>4</sub>. FE of O<sub>2</sub> production is around 93%.



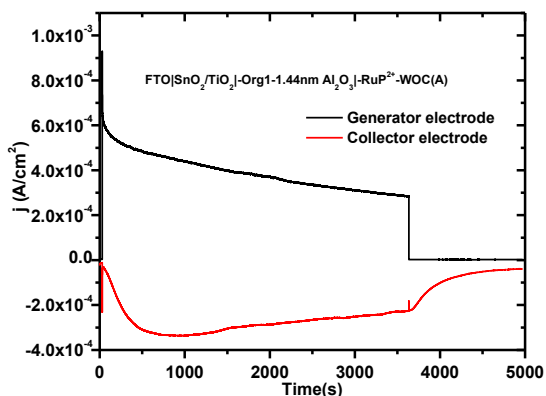

**Fig. S6.** O<sub>2</sub> measurements for water oxidation from (black), **FTO|SnO<sub>2</sub>/TiO<sub>2</sub>|Org1-1.44nm Al<sub>2</sub>O<sub>3</sub>|RuP<sup>2+</sup>-WOC(A)**, on 1 cm<sup>2</sup> slides illuminated with 100 mW cm<sup>-2</sup> white light with a 400 nm cutoff filter from 30 to 3630 s at a bias of 0.4V versus Ag/AgCl. The current-time response in red is for an O<sub>2</sub> sensing electrode, 1 mm from the photoanode biased at -0.85 V versus Ag/AgCl; in 0.1 M acetic acid/acetate buffer at pH 4.65 in 0.4 M NaClO<sub>4</sub>. FE of O<sub>2</sub> production is around 97%.

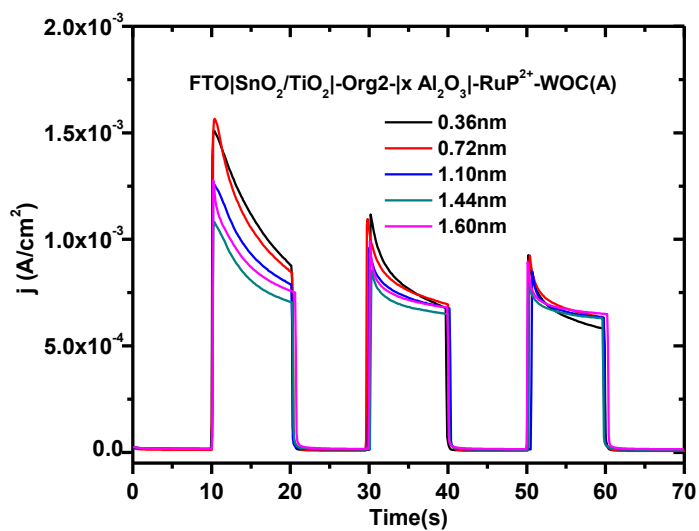

**Fig. S7.** Current–time (I-t) traces over 10 s dark–light cycles for water oxidation by the electrodes, **FTO|SnO<sub>2</sub>/TiO<sub>2</sub>|-Org2-|x Al<sub>2</sub>O<sub>3</sub>|-RuP<sup>2+</sup>-WOC(A)**, at an applied bias of 0.4 V versus Ag/AgCl; pH = 4.65, 0.1 M acetate, 0.4 M NaClO<sub>4</sub>. **WOC(A)** is the catalyst, [Ru(bda)(4-O(CH<sub>2</sub>)<sub>3</sub>P(O<sub>3</sub>H<sub>2</sub>)<sub>2</sub>-pyr)<sub>2</sub>].

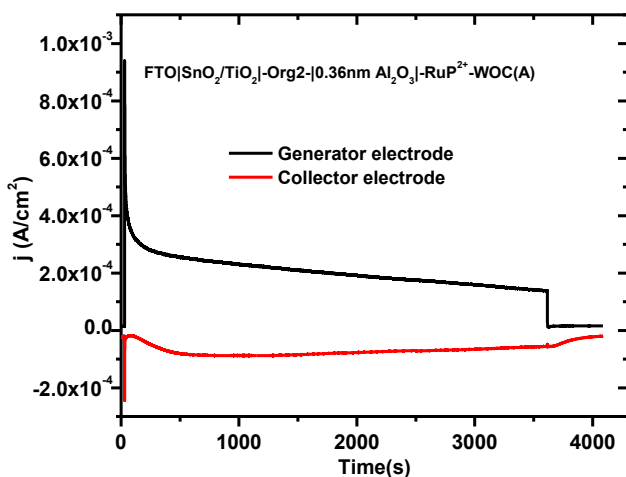

**Fig. S8.** O<sub>2</sub> measurements for water oxidation from (black), **FTO|SnO<sub>2</sub>/TiO<sub>2</sub>|-Org2-|0.36nm Al<sub>2</sub>O<sub>3</sub>|-RuP<sup>2+</sup>-WOC(A)**, on 1 cm<sup>2</sup> slides illuminated with 100 mW cm<sup>-2</sup> white light with a 400 nm cutoff filter from 30 to 3630 s at a bias of 0.4 V versus Ag/AgCl. The current-time response in red is for an O<sub>2</sub> sensing electrode, 1 mm from the photoanode biased at -0.85 V versus Ag/AgCl; in 0.1 M acetic acid/acetate buffer at pH 4.65 in 0.4 M NaClO<sub>4</sub>. FE of O<sub>2</sub> production is around 55%.

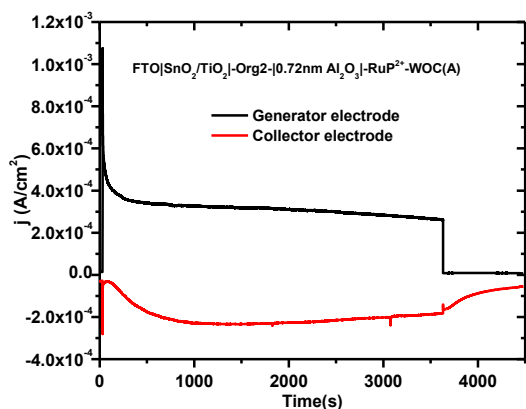

**Fig. S9.** O<sub>2</sub> measurements for water oxidation from (black), **FTO|SnO<sub>2</sub>/TiO<sub>2</sub>|-Org2-**  
**|0.72nm Al<sub>2</sub>O<sub>3</sub>|-RuP<sup>2+</sup>-WOC**, on 1 cm<sup>2</sup> slides illuminated with 100 mW cm<sup>-2</sup> white light  
 with a 400 nm cutoff filter from 30 to 3630 s at a bias of 0.4 V versus Ag/AgCl. The  
 current-time response in red is for an O<sub>2</sub> sensing electrode, 1 mm from the photoanode  
 biased at -0.85 V versus Ag/AgCl; in 0.1 M acetic acid/acetate buffer at pH 4.65 in 0.4  
 M NaClO<sub>4</sub>. FE of O<sub>2</sub> production is around 96%.

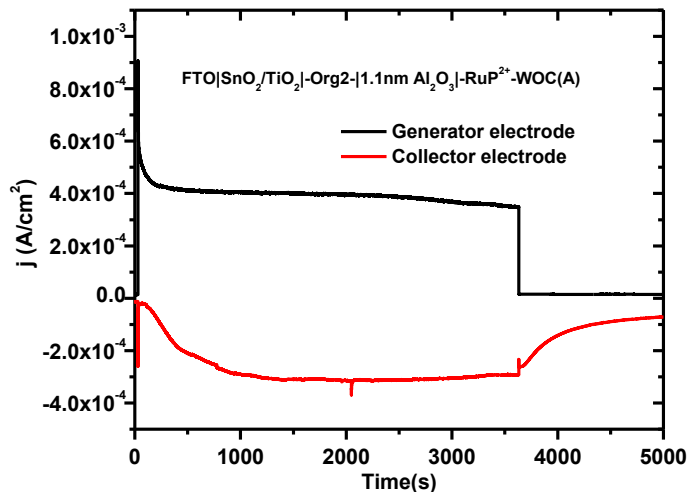

**Fig. S10.** O<sub>2</sub> measurements for water oxidation from (black), **FTO|SnO<sub>2</sub>/TiO<sub>2</sub>|-Org2-|1.1nm Al<sub>2</sub>O<sub>3</sub>|-RuP<sup>2+</sup>-WOC**, on 1 cm<sup>2</sup> slides illuminated with 100 mW cm<sup>-2</sup> white light with a 400 nm cutoff filter from 30 to 3630 s at a bias of 0.4 V versus Ag/AgCl. The current-time response in red is for an O<sub>2</sub> sensing electrode, 1 mm from the photoanode biased at -0.85 V versus Ag/AgCl; in 0.1 M acetic acid/acetate buffer at pH 4.65 in 0.4 M NaClO<sub>4</sub>. FE of O<sub>2</sub> production is around 100%.

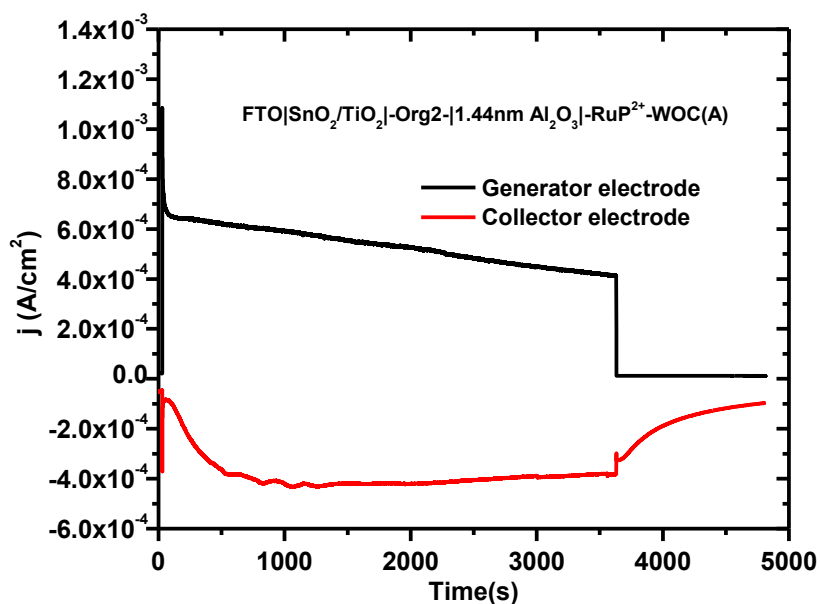

**Fig. S11.** O<sub>2</sub> measurements for water oxidation from (black), **FTO|SnO<sub>2</sub>/TiO<sub>2</sub>|-Org2-|1.44nm Al<sub>2</sub>O<sub>3</sub>|-RuP<sup>2+</sup>-WOC**, on 1 cm<sup>2</sup> slides illuminated with 100 mW cm<sup>-2</sup> white light with a 400 nm cutoff filter from 30 to 3630 s at a bias of 0.4 V versus Ag/AgCl. The current-time response in red is for an O<sub>2</sub> sensing electrode, 1 mm from the photoanode biased at -0.85 V versus Ag/AgCl; in 0.1 M acetic acid/acetate buffer at pH 4.65 in 0.4 M NaClO<sub>4</sub>. FE of O<sub>2</sub> production is around 100%.

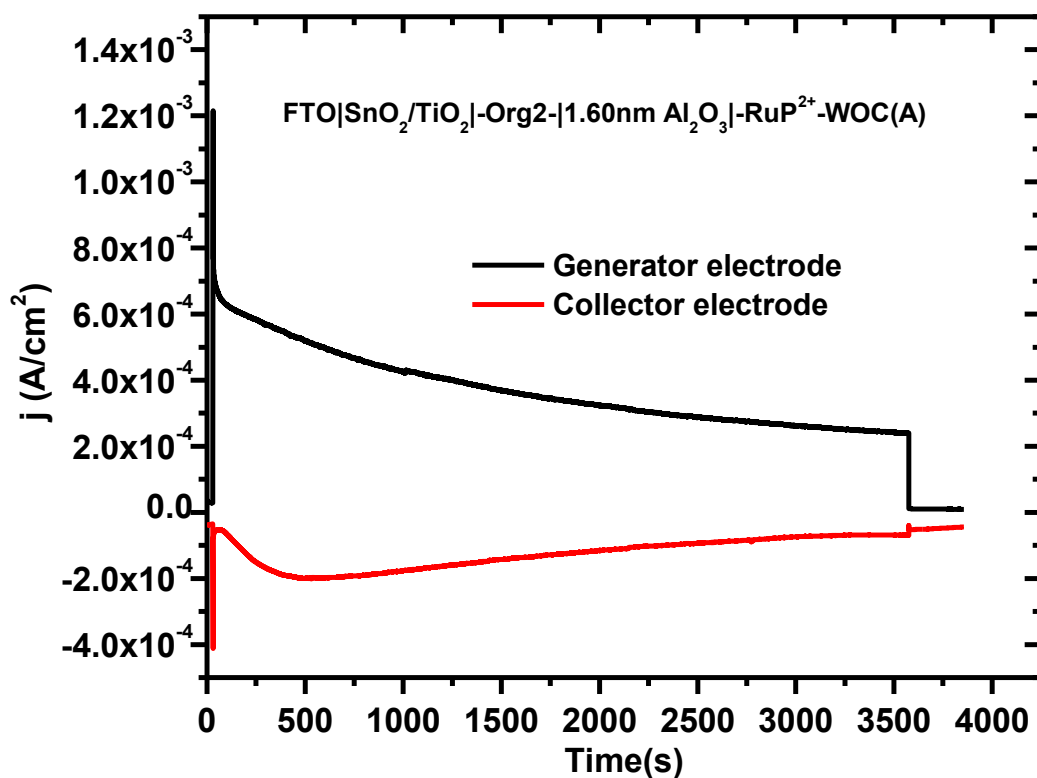

**Fig. S12.** O<sub>2</sub> measurements for water oxidation from (black), **FTO|SnO<sub>2</sub>/TiO<sub>2</sub>|-Org2-|15cycles ALD Al<sub>2</sub>O<sub>3</sub>|-RuP<sup>2+</sup>-WOC**, on 1 cm<sup>2</sup> slides illuminated with 100 mW cm<sup>-2</sup> white light with a 400 nm cutoff filter from 30 to 3630 s at a bias of 0.4 V versus Ag/AgCl. The current-time response in red is for an O<sub>2</sub> sensing electrode, 1 mm from the photoanode biased at -0.85 V versus Ag/AgCl; in 0.1 M acetic acid/acetate buffer at pH 4.65 in 0.4 M NaClO<sub>4</sub>. FE of O<sub>2</sub> production is around 49%.

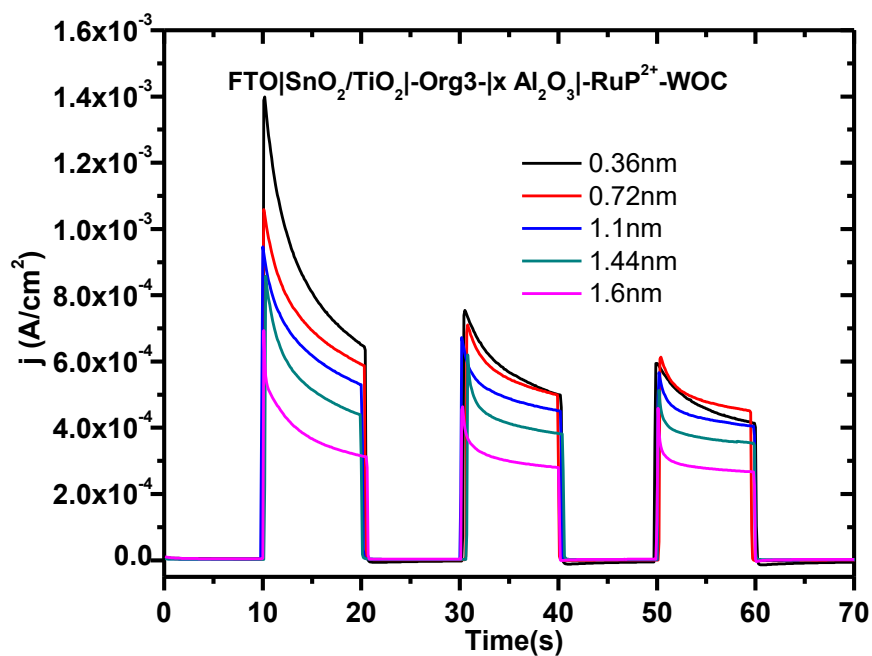

**Fig. S13.** Current–time (I-t) traces over 10 s dark–light cycles for water oxidation by the electrodes, **FTO|SnO<sub>2</sub>/TiO<sub>2</sub>|-Org3-|x Al<sub>2</sub>O<sub>3</sub>|-RuP<sup>2+</sup>-WOC(A)**, at an applied bias of 0.4 V versus Ag/AgCl; pH = 4.65, 0.1 M acetate, 0.4 M NaClO<sub>4</sub>. **WOC(A)** is the catalyst, [Ru(bda)(4-O(CH<sub>2</sub>)<sub>3</sub>P(O<sub>3</sub>H<sub>2</sub>)<sub>2</sub>-pyr)<sub>2</sub>].



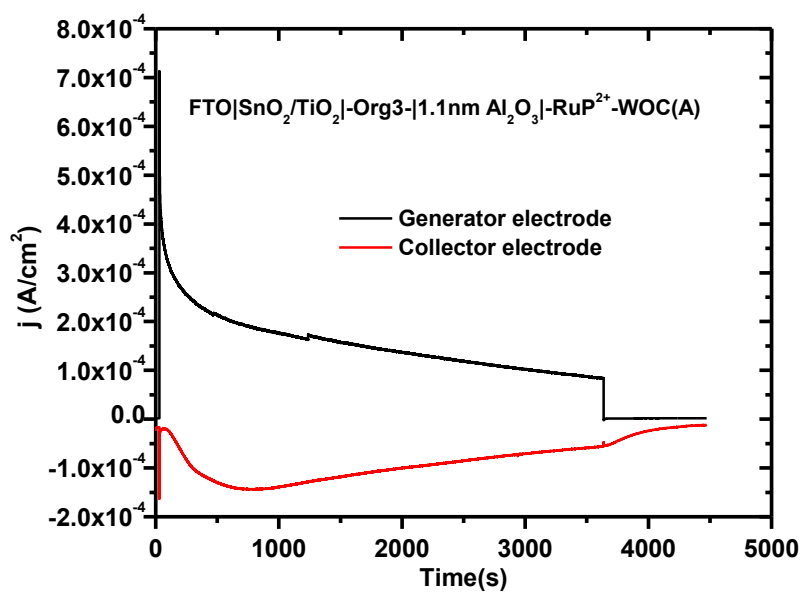

**Fig. S14.** O<sub>2</sub> measurements for water oxidation from (black), **FTO|SnO<sub>2</sub>/TiO<sub>2</sub>|-Org3-|1.1nm Al<sub>2</sub>O<sub>3</sub>|-RuP<sup>2+</sup>-WOC(A)**, on 1 cm<sup>2</sup> slides illuminated with 100 mW cm<sup>-2</sup> white light with a 400 nm cutoff filter from 30 to 3630 s at a bias of 0.4 V versus Ag/AgCl. The current-time response in red is for an O<sub>2</sub> sensing electrode, 1 mm from the photoanode biased at -0.85 V versus Ag/AgCl; in 0.1 M acetic acid/acetate buffer at pH 4.65 in 0.4 M NaClO<sub>4</sub>. FE of O<sub>2</sub> production is around 100%.

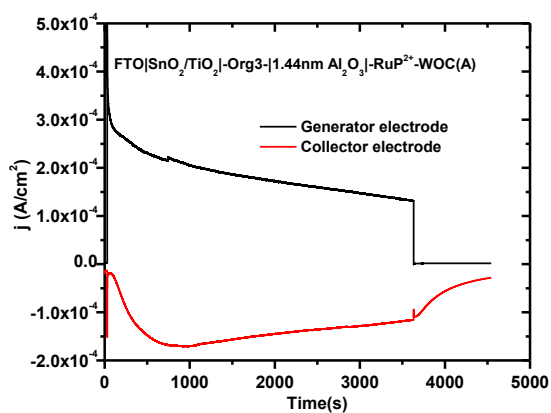

**Fig. S15.** O<sub>2</sub> measurements for water oxidation from (black), **FTO|SnO<sub>2</sub>/TiO<sub>2</sub>|Org3-[1.44nm Al<sub>2</sub>O<sub>3</sub>]-RuP<sup>2+</sup>-WOC(A)**, on 1 cm<sup>2</sup> slides illuminated with 100 mW cm<sup>-2</sup> white light with a 400 nm cutoff filter from 30 to 3630 s at a bias of 0.4 V versus Ag/AgCl. The current-time response in red is for an O<sub>2</sub> sensing electrode, 1 mm from the photoanode biased at -0.85 V versus Ag/AgCl; in 0.1 M acetic acid/acetate buffer at pH 4.65 in 0.4 M NaClO<sub>4</sub>. FE of O<sub>2</sub> production is around 100%.

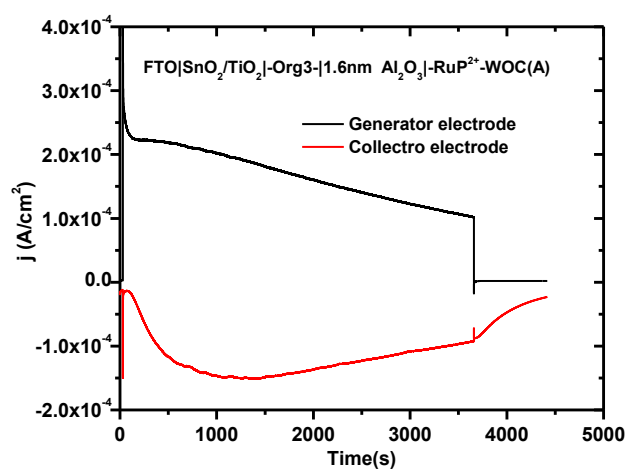

**Fig. S16.** O<sub>2</sub> measurements for water oxidation from (black), **FTO|SnO<sub>2</sub>/TiO<sub>2</sub>|Org3-[9cycles ALD Al<sub>2</sub>O<sub>3</sub>]-RuP<sup>2+</sup>-WOC**, on 1 cm<sup>2</sup> slides illuminated with 100 mW cm<sup>-2</sup> white light with a 400 nm cutoff filter from 30 to 3630 s at a bias of 0.4 V versus Ag/AgCl. The current-time response in red is for an O<sub>2</sub> sensing electrode, 1 mm from the photoanode biased at -0.85 V versus Ag/AgCl; in 0.1 M acetic acid/acetate buffer at pH 4.65 in 0.4 M NaClO<sub>4</sub>. FE of O<sub>2</sub> production is around 95%.

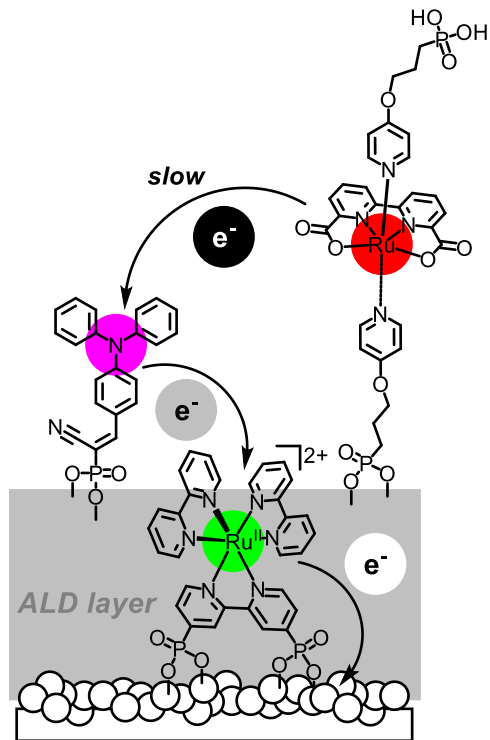

**Scheme S1:** One series of experiments, electrodes were prepared with the position of the dyes reversed. In this assembly, with **RuP<sup>2+</sup>** as the light absorber, followed by ALD deposition of an Al<sub>2</sub>O<sub>3</sub> overlayer of **Org1** by adsorption, gave the electrode, - **FTO|SnO<sub>2</sub>/TiO<sub>2</sub>|-RuP<sup>2+</sup>|1.1nmAl<sub>2</sub>O<sub>3</sub>|-Org1-WOC(A).**

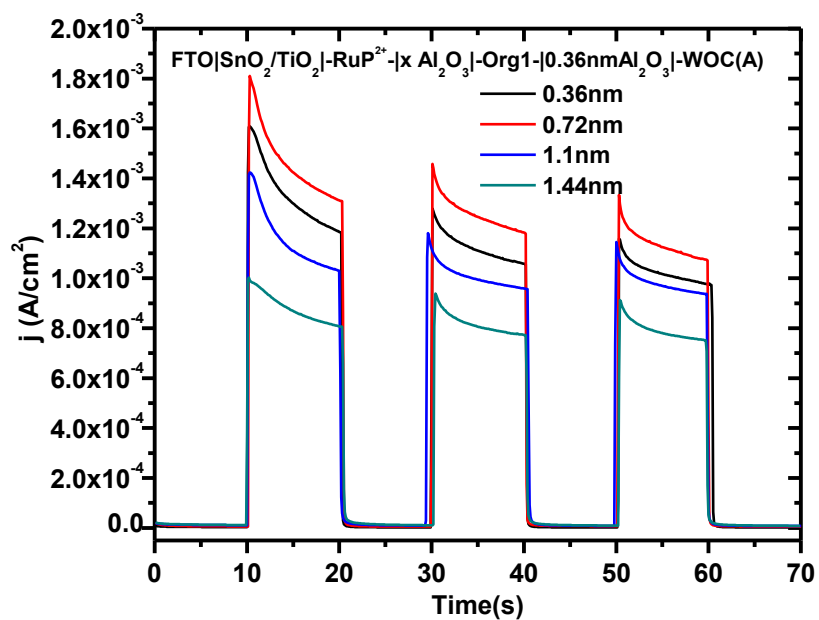

**Fig. S17.** Current–time (I-t) traces over 10 s dark–light cycles for water oxidation by the electrodes, FTO|SnO<sub>2</sub>/TiO<sub>2</sub>|-RuP<sup>2+</sup>-|Al<sub>2</sub>O<sub>3</sub>|-Org1-|0.36nm Al<sub>2</sub>O<sub>3</sub>|-WOC(A), at an applied bias of 0.4 V versus Ag/AgCl; pH = 4.65, 0.1 M acetate, 0.4 M NaClO<sub>4</sub>

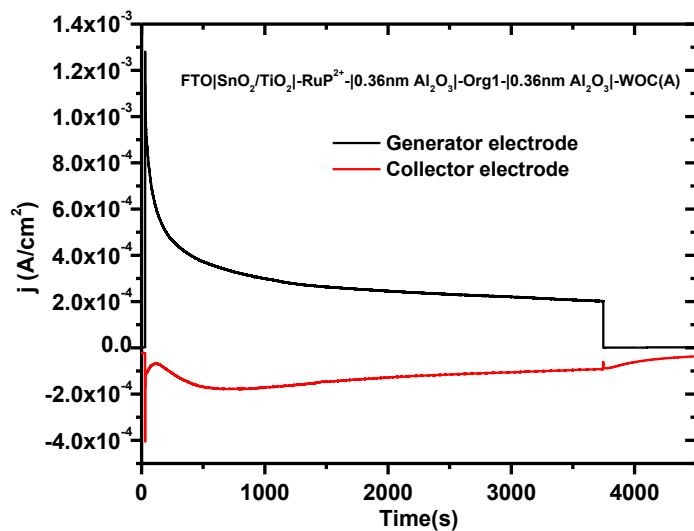

**Fig. S18.** O<sub>2</sub> measurements for water oxidation from (black), **FTO|SnO<sub>2</sub>/TiO<sub>2</sub>|-RuP<sup>2+</sup>-|0.36nm Al<sub>2</sub>O<sub>3</sub>|-Org1-|0.36nm Al<sub>2</sub>O<sub>3</sub>|-WOC(A)**, on 1 cm<sup>2</sup> slides illuminated with 100 mW cm<sup>-2</sup> white light with a 400 nm cutoff filter from 30 to 3630 s at a bias of 0.4 V versus Ag/AgCl. The current-time response in red is for an O<sub>2</sub> sensing electrode, 1 mm from the photoanode biased at -0.85 V versus Ag/AgCl; in 0.1 M acetic acid/acetate buffer at pH 4.65 in 0.4 M NaClO<sub>4</sub>. FE of O<sub>2</sub> production is around 67%.

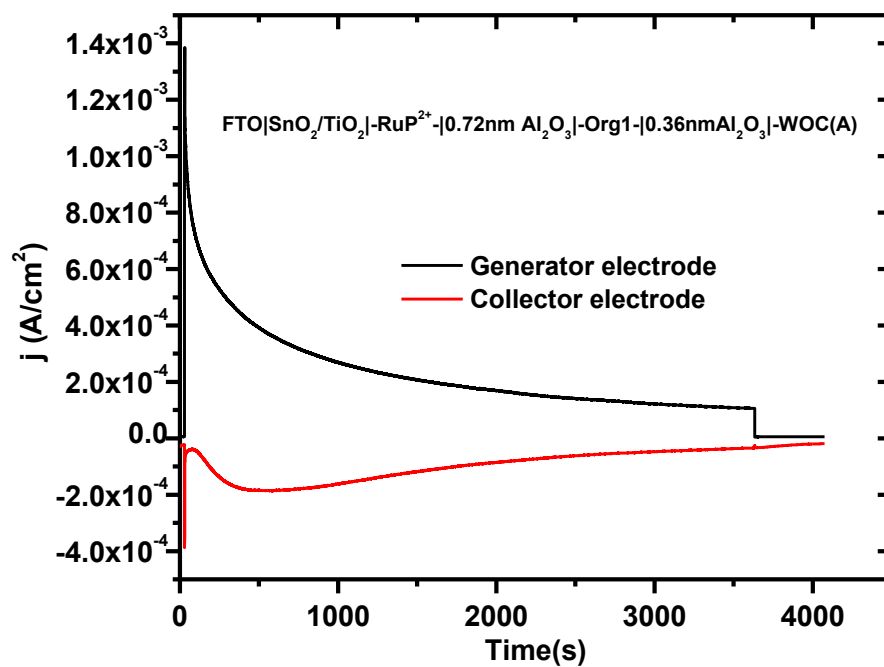

**Fig. S19.** O<sub>2</sub> measurements for water oxidation from (black), **FTO|SnO<sub>2</sub>/TiO<sub>2</sub>|-RuP<sup>2+</sup>-|0.72nm Al<sub>2</sub>O<sub>3</sub>|-Org1-|0.36nm Al<sub>2</sub>O<sub>3</sub>|-WOC(A)**, on 1 cm<sup>2</sup> slides illuminated with 100 mW cm<sup>-2</sup> white light with a 400 nm cutoff filter from 30 to 3630 s at a bias of 0.4 V versus Ag/AgCl. The current-time response in red is for an O<sub>2</sub> sensing electrode, 1 mm from the photoanode biased at -0.85 V versus Ag/AgCl; in 0.1 M acetic acid/acetate buffer at pH 4.65 in 0.4 M NaClO<sub>4</sub>. FE of O<sub>2</sub> production is around 61%.

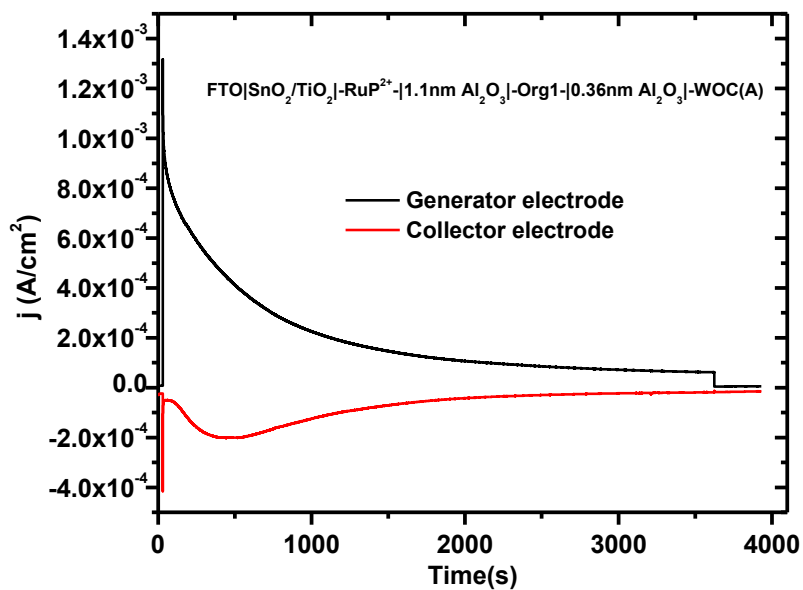

**Fig. S20.**  $\text{O}_2$  measurements for water oxidation from (black),  $\text{FTO}|\text{SnO}_2/\text{TiO}_2|-\text{RuP}^{2+}-$   
 $|\text{1.1nm Al}_2\text{O}_3|-\text{Org1}-|\text{0.36nm Al}_2\text{O}_3|-\text{WOC(A)}$ , on  $1 \text{ cm}^2$  slides illuminated with  $100 \text{ mW cm}^{-2}$  white light with a 400 nm cutoff filter from 30 to 3630 s at a bias of 0.4 V versus Ag/AgCl. The current-time response in red is for an  $\text{O}_2$  sensing electrode, 1 mm from the photoanode biased at  $-0.85 \text{ V}$  versus Ag/AgCl; in 0.1 M acetic acid/acetate buffer at pH 4.65 in 0.4 M  $\text{NaClO}_4$ . FE of  $\text{O}_2$  production is around 58%.



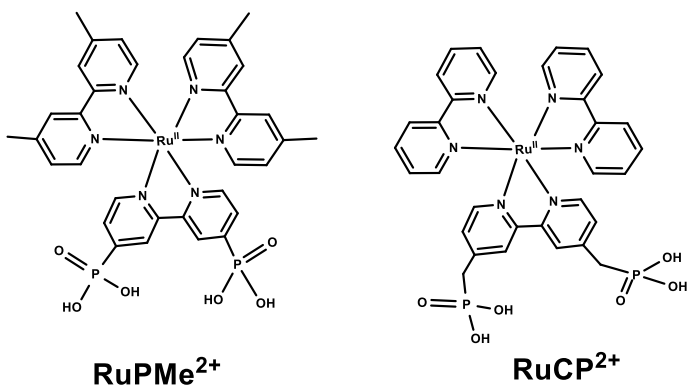

**Scheme S2.** The structures of the other electron transfer mediators RuPMe<sup>2+</sup> and RuCP<sup>2+</sup>

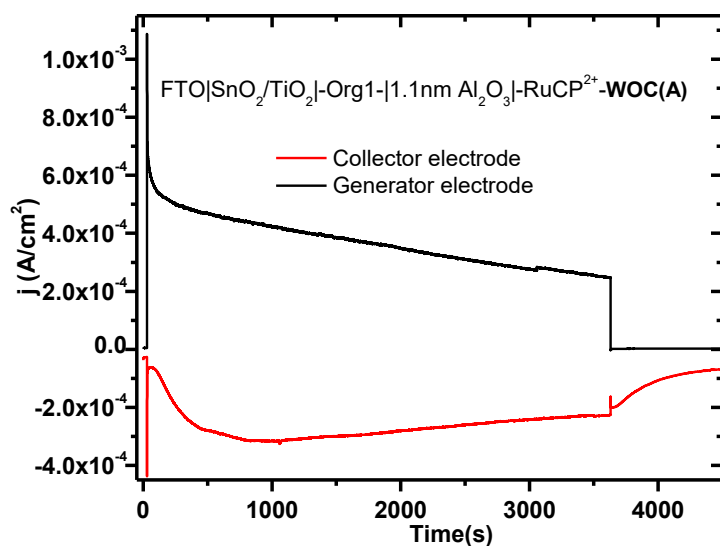

**Fig. S21.** O<sub>2</sub> measurements for water oxidation from (black), **FTO|SnO<sub>2</sub>/TiO<sub>2</sub>|-Org1-|1.1nm Al<sub>2</sub>O<sub>3</sub>|-RuCP<sup>2+</sup>-WOC(A)**, on 1 cm<sup>2</sup> slides illuminated with 100 mW cm<sup>-2</sup> white light with a 400 nm cutoff filter from 30 to 3630 s at a bias of 0.4 V versus Ag/AgCl. The current-time response in red is for an O<sub>2</sub> sensing electrode, 1 mm from the photoanode biased at -0.85 V versus Ag/AgCl; in 0.1 M acetic acid/acetate buffer at pH 4.65 in 0.4 M NaClO<sub>4</sub>. FE of O<sub>2</sub> production is around 95%.

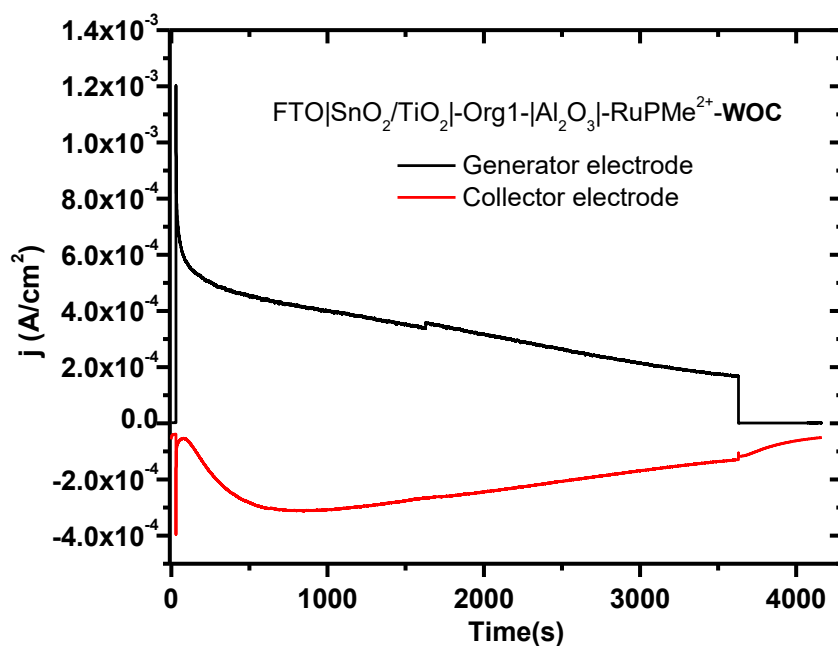

**Fig. S22.** O<sub>2</sub> measurements for water oxidation from (black), **FTO|SnO<sub>2</sub>/TiO<sub>2</sub>|-Org1-|1.1nm Al<sub>2</sub>O<sub>3</sub>|-RuCP<sup>2+</sup>-WOC(A)**, on 1 cm<sup>2</sup> slides illuminated with 100 mW cm<sup>-2</sup> white light with a 400 nm cutoff filter from 30 to 3630 s at a bias of 0.4V versus Ag/AgCl. The current-time response in red is for an O<sub>2</sub> sensing electrode, 1 mm from the photoanode biased at -0.85 V versus Ag/AgCl; in 0.1 M acetic acid/acetate buffer at pH 4.65 in 0.4 M NaClO<sub>4</sub>. FE of O<sub>2</sub> production is around 78%.

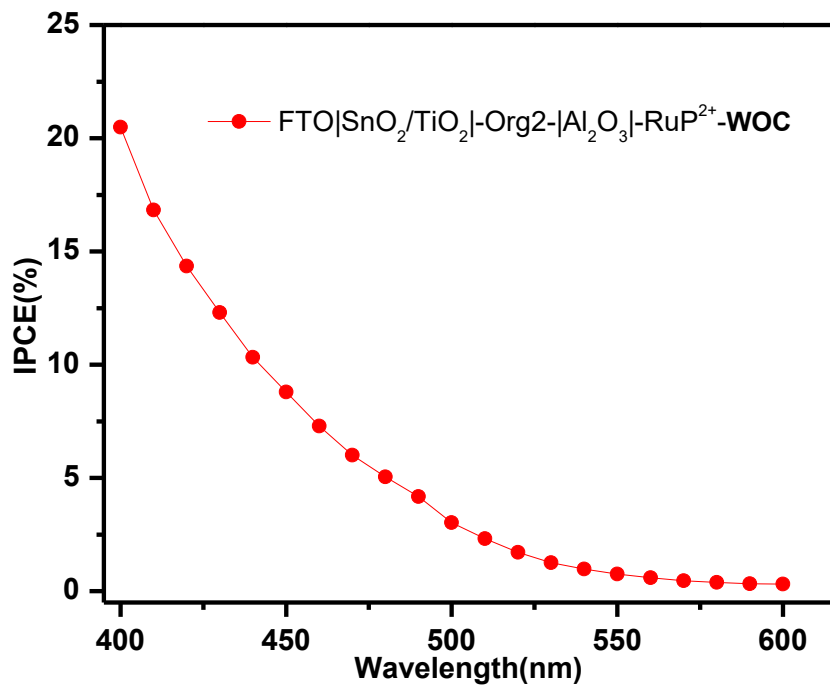

**Fig. S23.** IPCE results for, **SnO<sub>2</sub>/TiO<sub>2</sub>|-Org2-|1.1nm Al<sub>2</sub>O<sub>3</sub>|-RuP<sup>2+</sup>-WOC**, at an applied bias of 0.4 V versus Ag/AgCl at pH = 4.65 0.1 M in acetate, 0.4 M NaClO<sub>4</sub>.

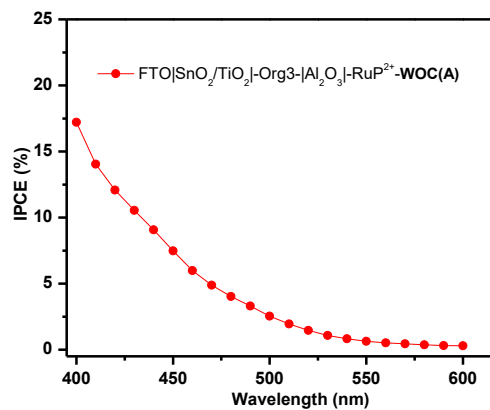

**Fig. S24.** IPCE results for, **FTO|SnO<sub>2</sub>/TiO<sub>2</sub>|Org3-|1.1nm Al<sub>2</sub>O<sub>3</sub>|-RuP<sup>2+</sup>-WOC(A)**, at an applied bias of 0.4 V versus Ag/AgCl at pH = 4.65 0.1 M in acetate, 0.4 M NaClO<sub>4</sub>.

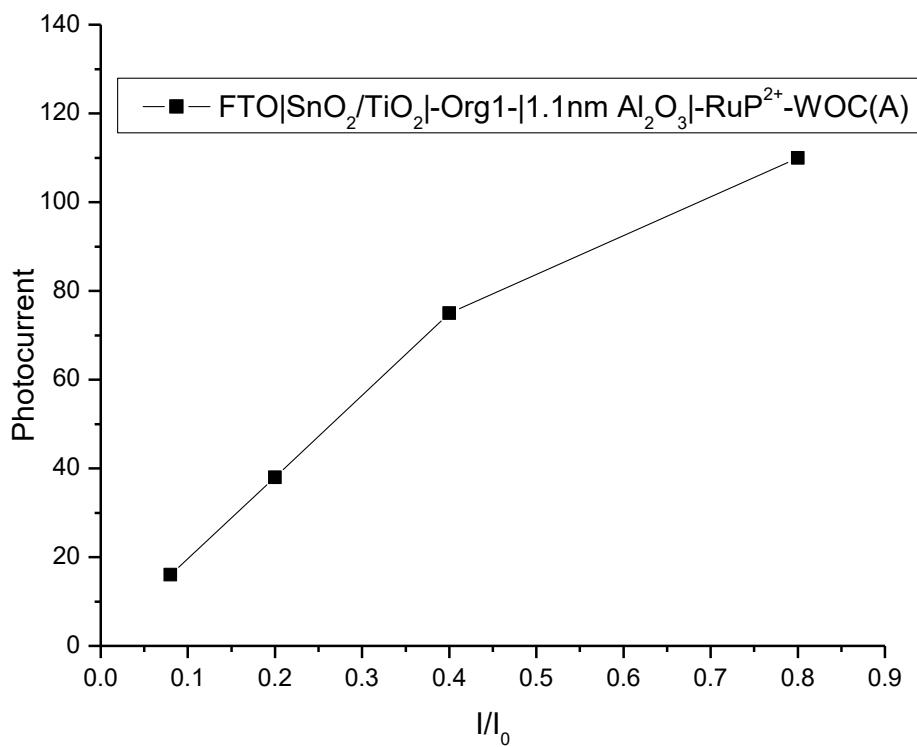

**Fig. S25.** The photo-responds of the electrode, FTO|SnO<sub>2</sub>/TiO<sub>2</sub>|Org1-|1.1nmAl<sub>2</sub>O<sub>3</sub>|-RuP<sup>2+</sup>-WOC under different light intensity. The measurement was performed, at an applied bias of 0.4 V versus Ag/AgCl at pH = 4.65 0.1 M in acetate, 0.4 M NaClO<sub>4</sub>. I<sub>0</sub> is the one sun illumination. And the I is the applied light intensity using filter to modulate the photons pass.

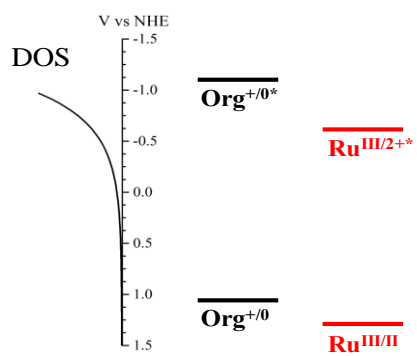

**Fig. S26.** The energy diagram of the organic dye **Org1** and **RuP<sup>2+</sup>** molecular.

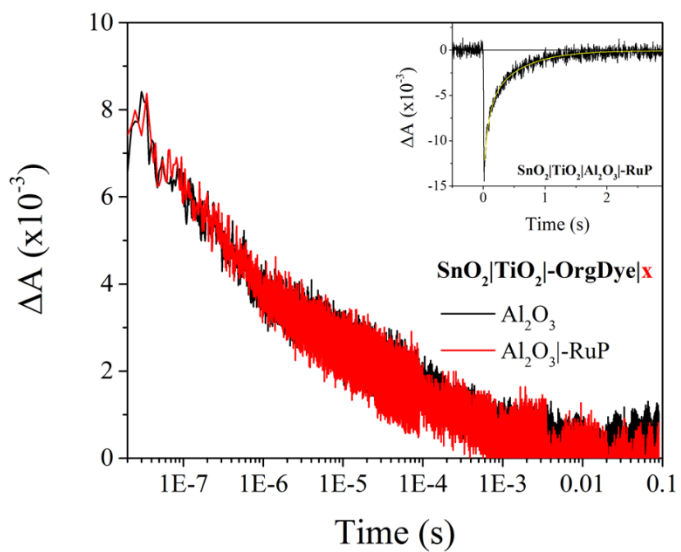

**Fig. S27.** The Transient absorption spectrum of the electrode: FTO|SnO<sub>2</sub>/TiO<sub>2</sub>|-Organic dye-|1.1nm Al<sub>2</sub>O<sub>3</sub>|-X



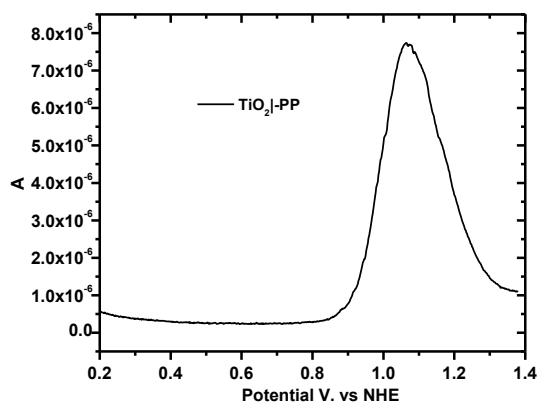

**Fig. S28.** Differential pulse voltammograms of FTO|TiO<sub>2</sub>|PP. The TiO<sub>2</sub>/FTO electrodes with a TiO<sub>2</sub> thickness of 4  $\mu$ m were prepared by doctor blade technique. The electrochemical measurements were carried out in pH4.65, 0.1M acetate buffer with 0.4M NaClO<sub>4</sub> .

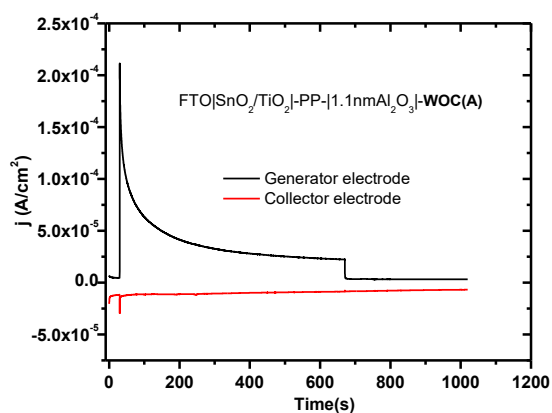

**Fig. S29.** O<sub>2</sub> measurements for water oxidation from (black), **FTO|SnO<sub>2</sub>/TiO<sub>2</sub>|-Porphrin-9cycles ALD Al<sub>2</sub>O<sub>3</sub>|-WOC**, on 1 cm<sup>2</sup> slides illuminated with 100 mW cm<sup>-2</sup> white light with a 400 nm cutoff filter from 30 to 3630 s at a bias of 0.4 V versus Ag/AgCl. The current-time response in red is for an O<sub>2</sub> sensing electrode, 1 mm from the photoanode biased at -0.85 V versus Ag/AgCl; in 0.1 M acetic acid/acetate buffer at pH 4.65 in 0.4 M NaClO<sub>4</sub>. FE of O<sub>2</sub> production is around 0%.

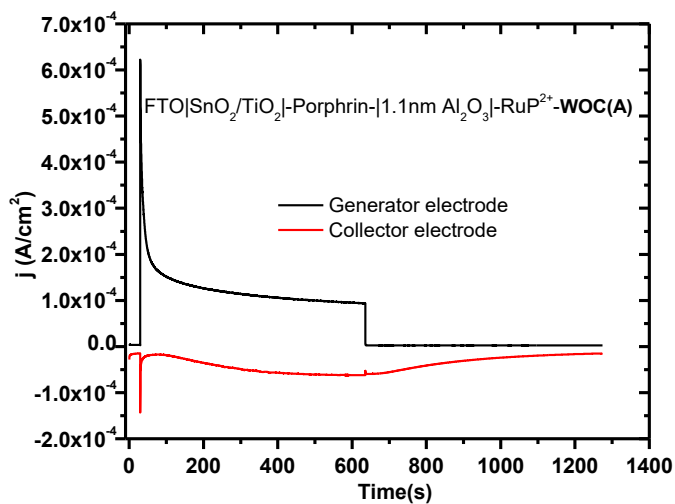

**Fig. S30.**  $\text{O}_2$  measurements for water oxidation from (black), **FTO|SnO<sub>2</sub>/TiO<sub>2</sub>|Porphrin-[1.1nm Al<sub>2</sub>O<sub>3</sub>]-RuP<sup>2+</sup>-WOC(A)**, on 1 cm<sup>2</sup> slides illuminated with 100 mW cm<sup>-2</sup> white light with a 400 nm cutoff filter from 30 to 3630 s at a bias of 0.4 V versus Ag/AgCl. The current-time response in red is for an O<sub>2</sub> sensing electrode, 1 mm from the photoanode biased at -0.85 V versus Ag/AgCl; in 0.1 M acetic acid/acetate buffer at pH 4.65 in 0.4 M NaClO<sub>4</sub>. FE of O<sub>2</sub> production is around 78%.

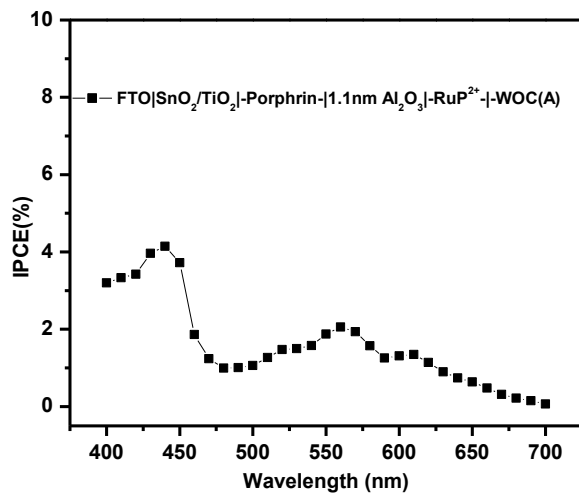

**Fig. S31.** IPCE results for, **FTO|SnO<sub>2</sub>/TiO<sub>2</sub>|PP-[1.1nmAl<sub>2</sub>O<sub>3</sub>]-WOC(A)** at an applied bias of 0.4 V versus Ag/AgCl at pH = 4.65 0.1 M in acetate, 0.4 M NaClO<sub>4</sub>. A 400 nm cutoff filter was used.
